# Supplementary material
Source: publisher figshare collection journal article supplement (https://acs.figshare.com/ndownloader/files/4169227)
Supplement: Supplementary file 1 [file 4169227]

Supporting Information for Facile Synthesis and  
Evaluation of Fibrous Iron-carbon Based Non-  
precious Oxygen Reduction Reaction Catalysts for  
Li-O<sub>2</sub> Battery Applications

*Jason Wu, Hey Woong Park, Aiping Yu\*, Drew Higgins, Zhongwei Chen\**

Department of Chemical Engineering, Waterloo Institute for Nanotechnology, Waterloo Institute  
for Sustainable Energy, University of Waterloo, Waterloo, Ontario, Canada, N2L 3G1

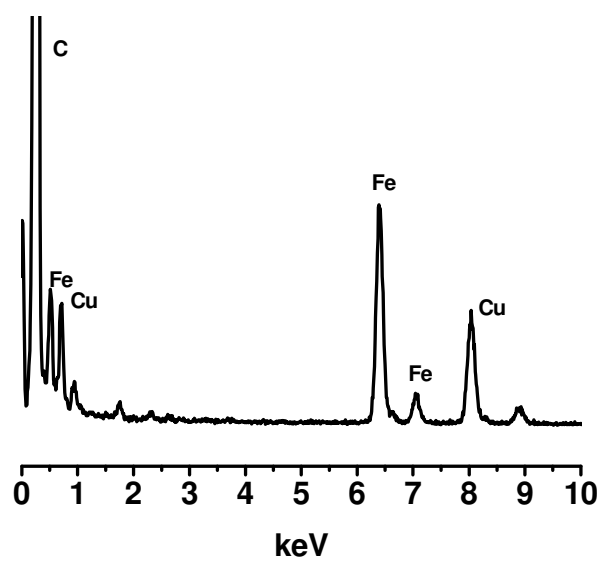

**Figure S1.** EDS spectrum of FePAN4-900 non-precious catalyst.

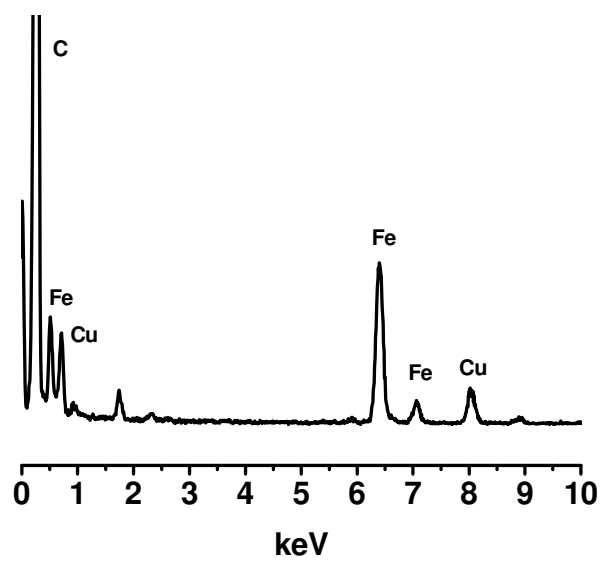

**Figure S2.** EDS spectrum of FePAN4-900-AH non-precious catalyst.

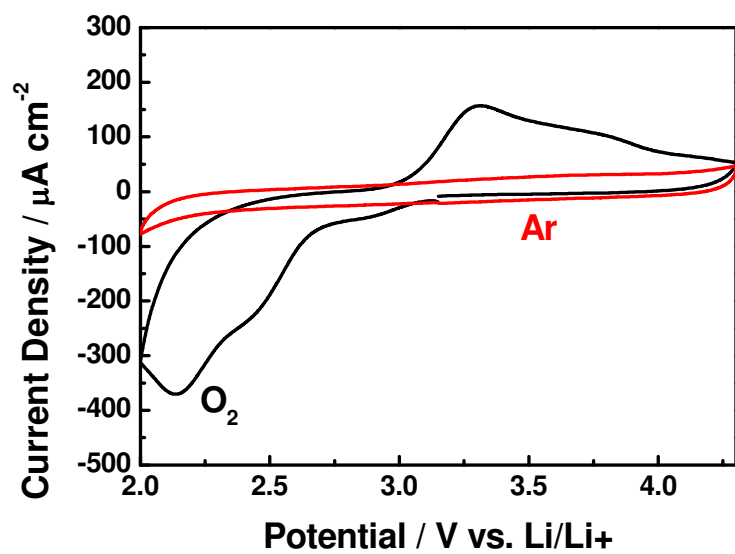

**Figure S3.** Cyclic voltammogram of FePAN4-900-AH catalyst in Ar- and O<sub>2</sub>-saturated TEGDME electrolyte.
